# Supplementary material
Source: PubMed Central journal article supplement (PMC4175726)
Supplement: NIHMS627555-supplement-Supplementary_Figures.pdf [file NIHMS627555-supplement-Supplementary_Figures.pdf]

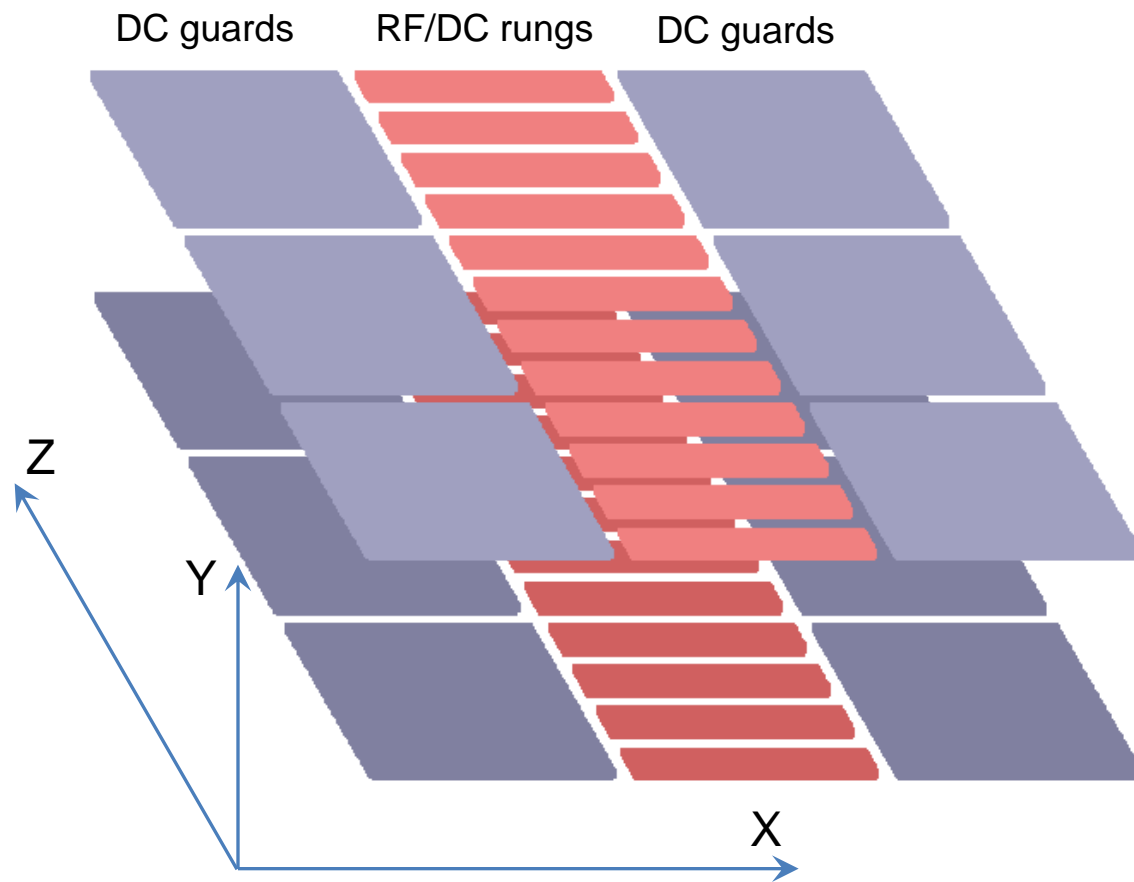

x: transversal direction  
y: vertical axis, perpendicular to boards  
z: ion travel direction

Figure 1

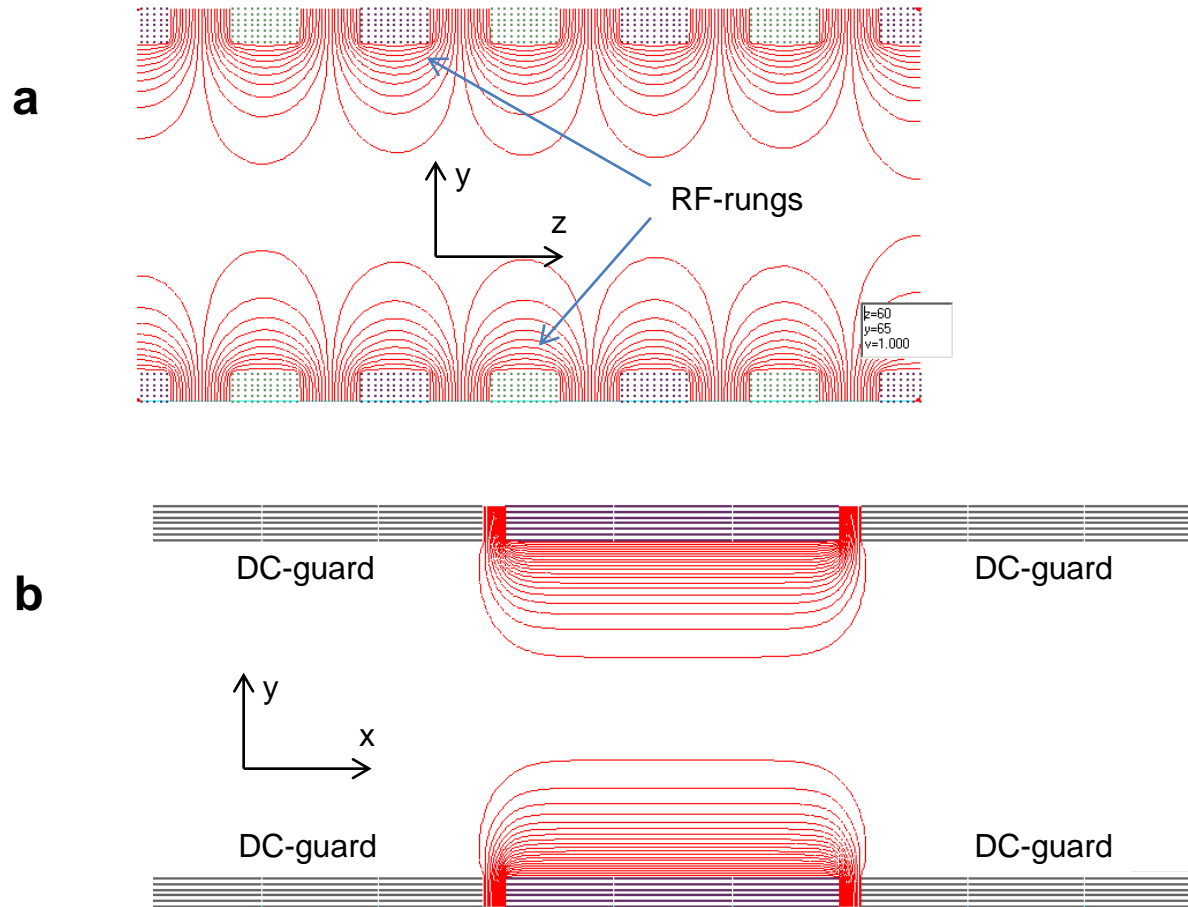

Figure 2

**a**

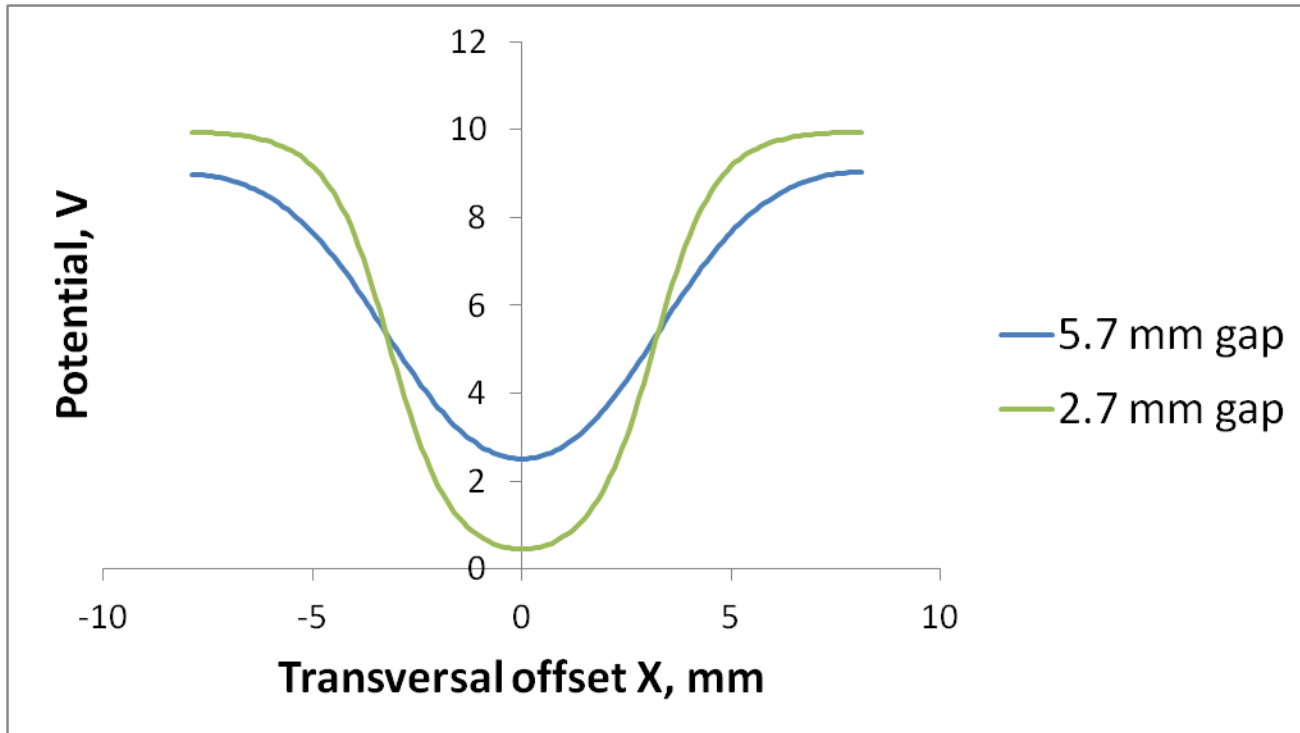

Figure 3a

**b**

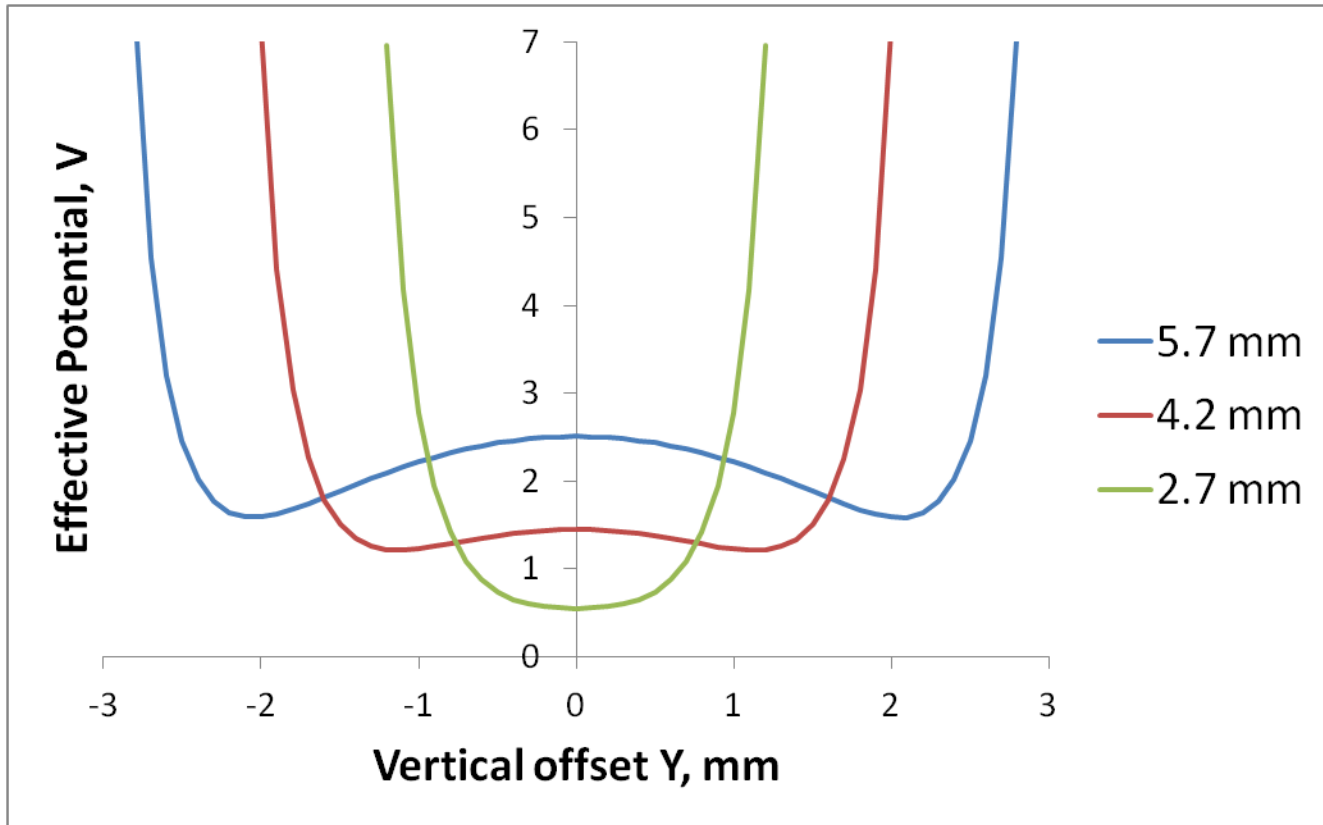

Figure 3b

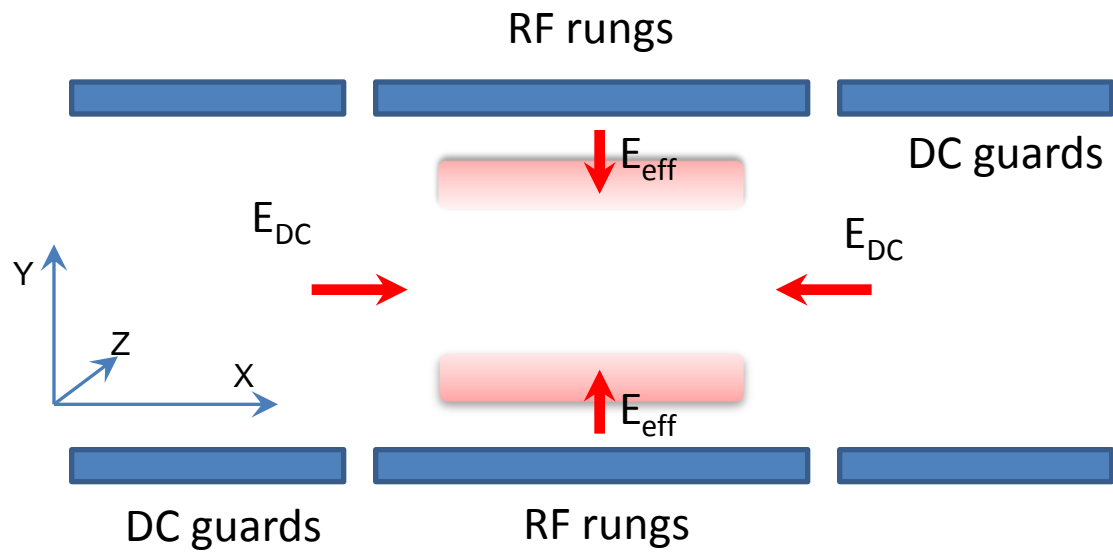

Figure 4

**a**

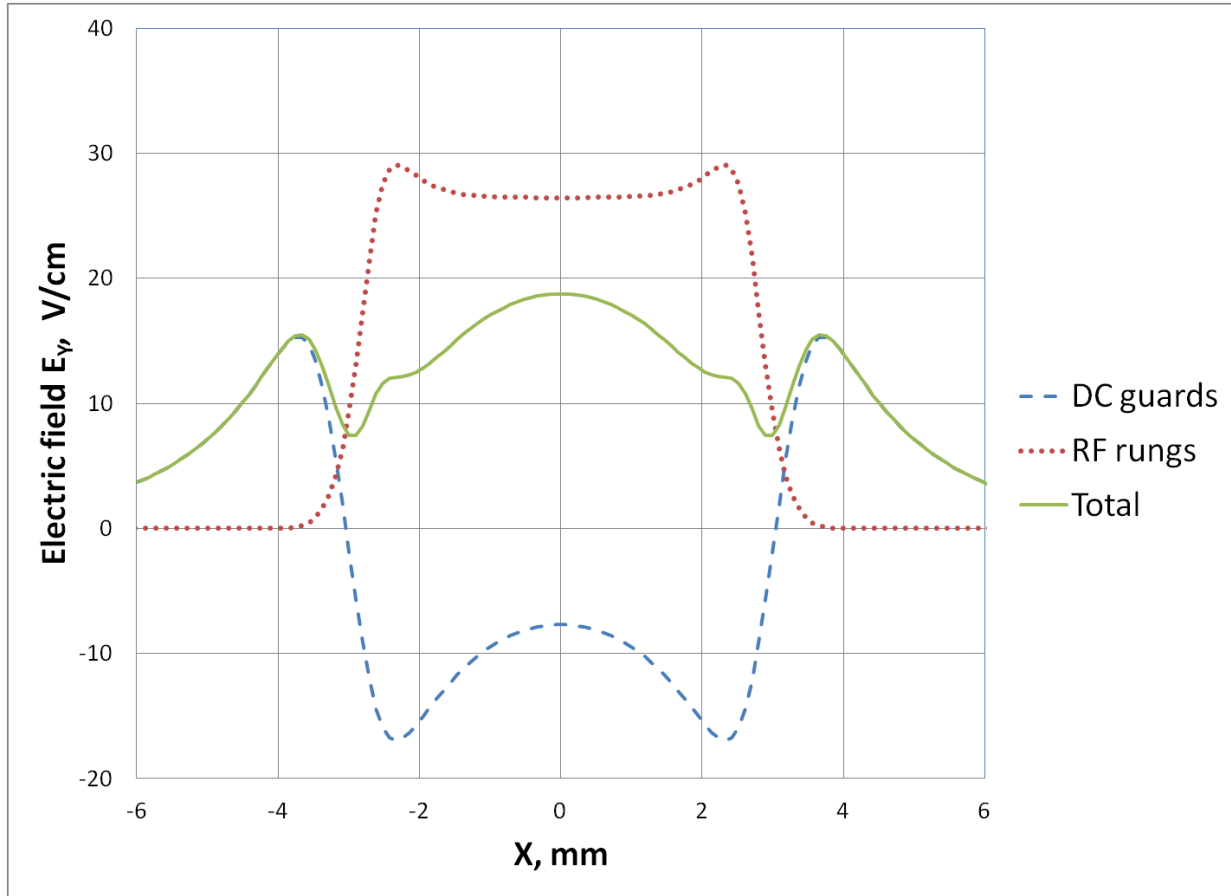

Figure 5a

**b**

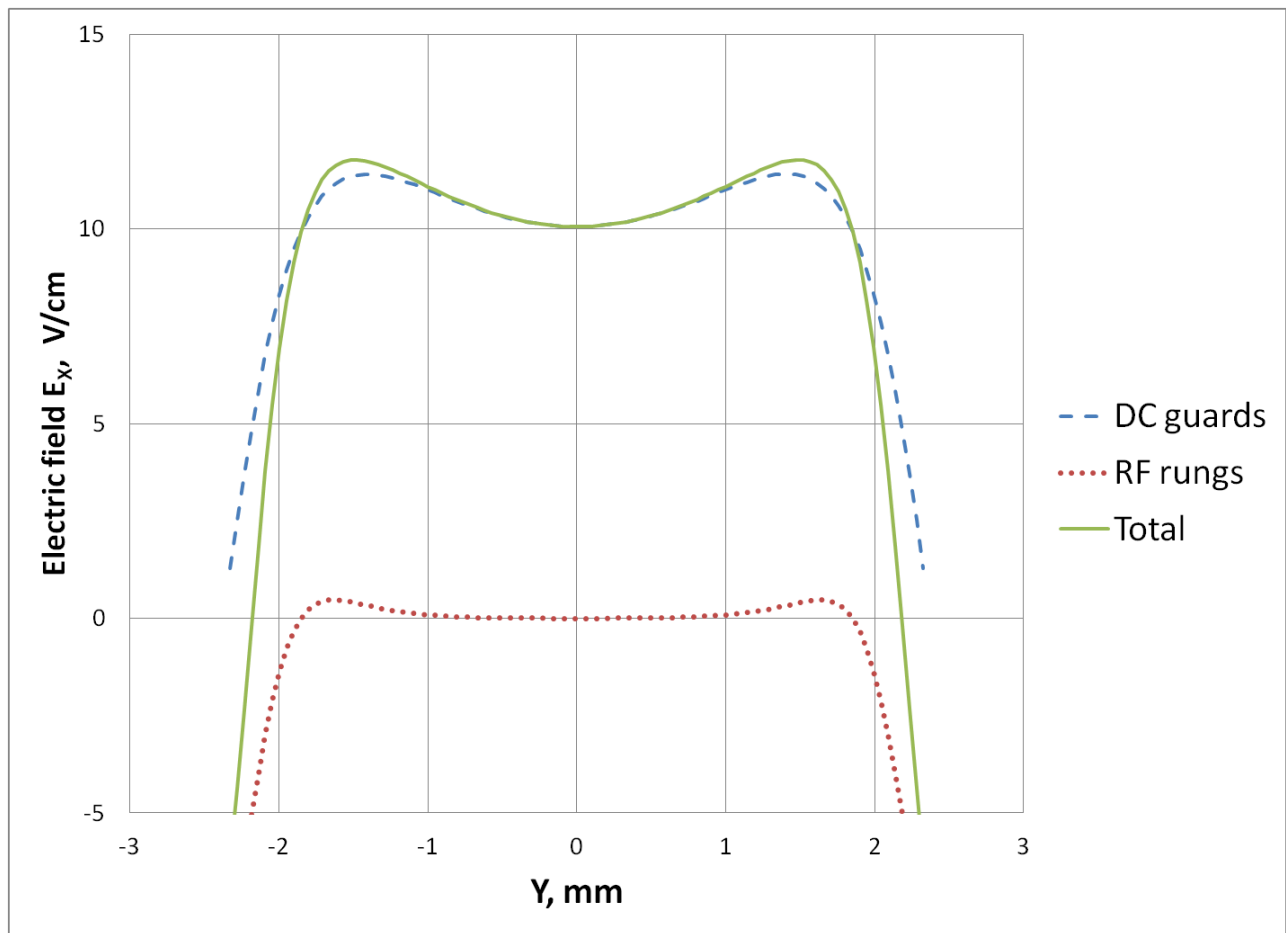

Figure 5b

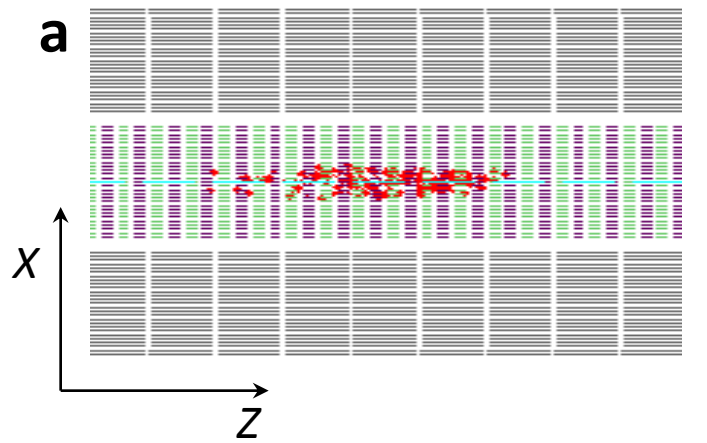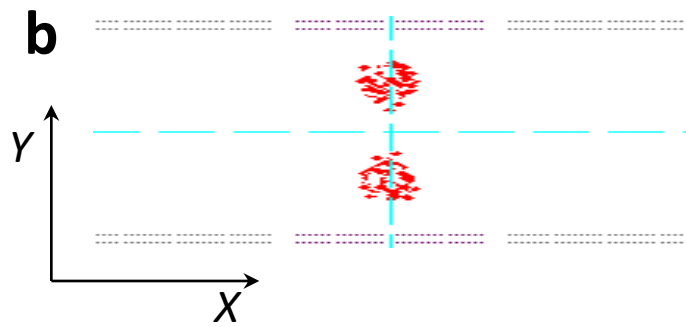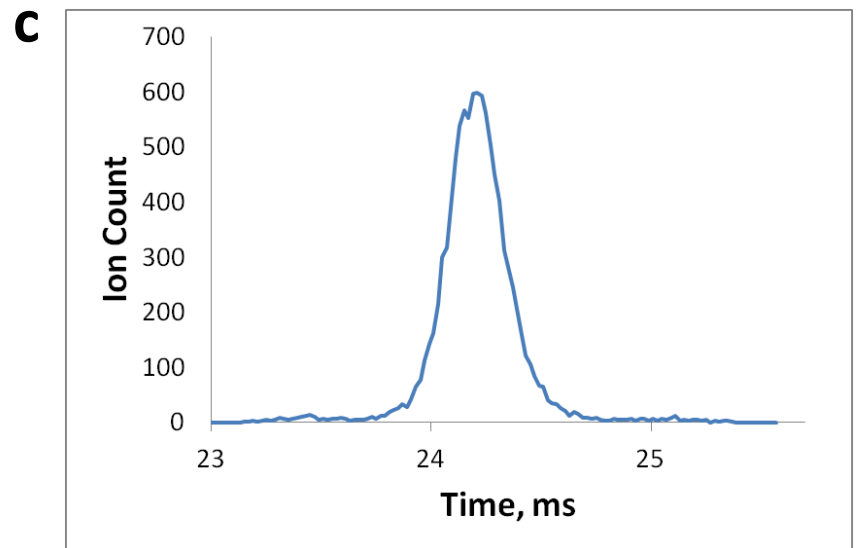

Figure 6



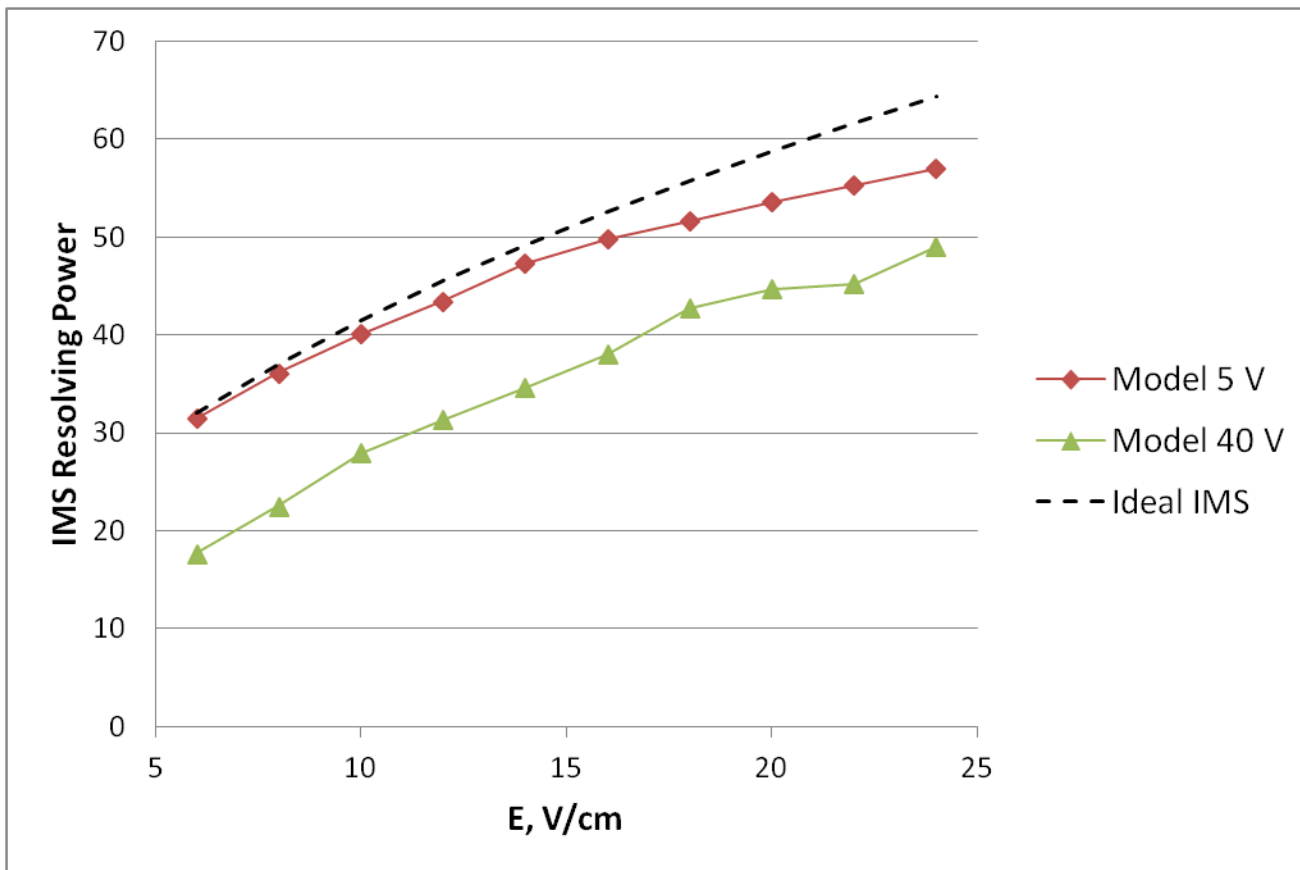

Figure 7
